# Supplementary material for: A Soft Skin Adhesive (SSA) Patch for Extended Release of Pirfenidone in Burn Wounds
Source: MDPI journal article supplement (doi:10.3390/pharmaceutics15071842), 2023-06-28
Supplement: s1 [file s1]

## Supplemental Materials

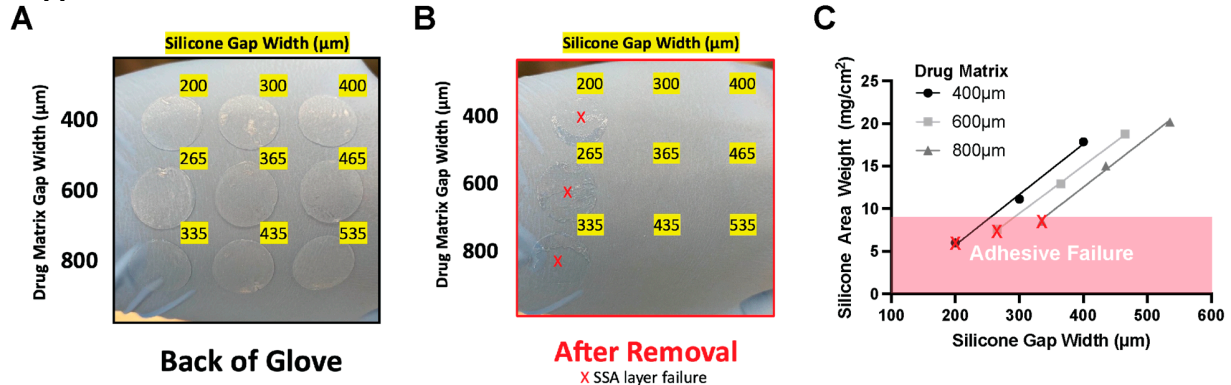

**Supplemental Figure S1.** SSA delamination and incomplete curing dependent on effective area weight of SSA layer. (A) Photograph of patch variations applied to the back of the glove. (B) Photograph of back of the glove after patch removal demonstrating SSA layer failure. (C) Effective area weight of the SSA layer across the drug matrix thicknesses and SSA layer thicknesses patch variations.

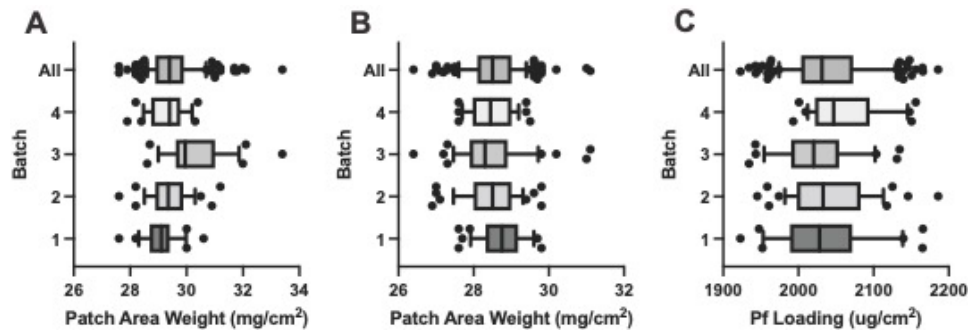

**Supplemental Figure S2.** Area weight and Pf loading characterization of patches used in in vivo and ex vivo porcine studies. (A) Area weight of patch vehicle controls across four batches (n=150). (B) Area weight of pirfenidone loaded patches across four batches (n=181). (C) Drug loading quantification of pirfenidone loaded patches across four batches (n=150). Box and whisker plots with whiskers showing 10-90 percentile.

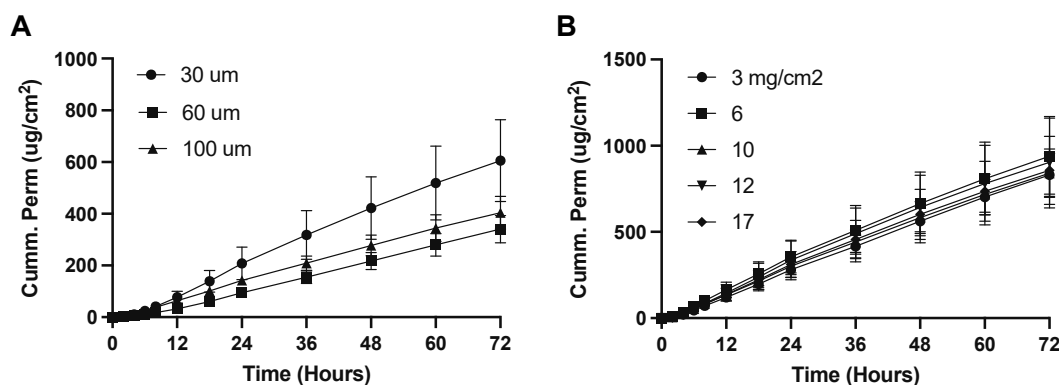

**Supplemental Figure S3.** *In vitro* permeation test (IVPT) through intact human skin of patches with (A) varying thickness of commercial backing and (B) varying thickness of MG 7-9850 SSA layer.

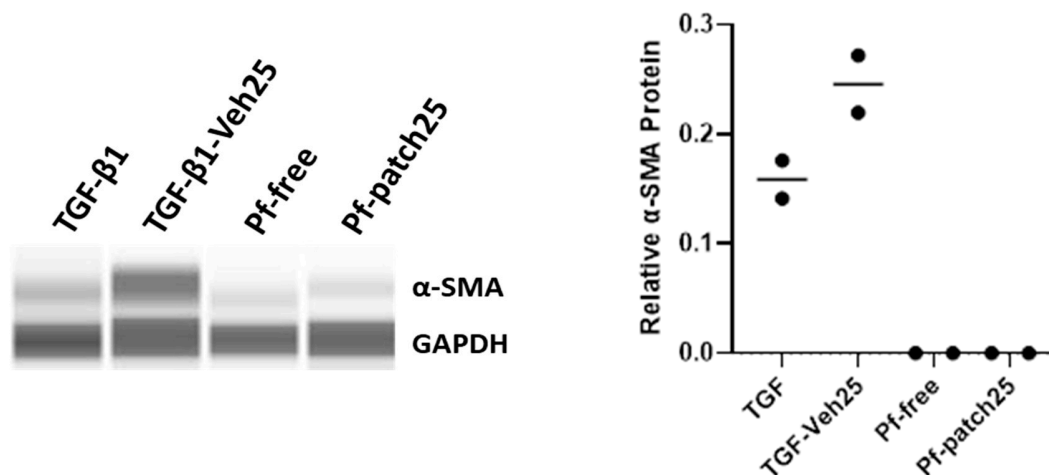

**Supplemental Figure S4.** In vitro activity of released Pf in stimulated human dermal myofibroblasts after 12 months of storage at normal conditions (25°C at 60% RH). (mean  $\pm$  SD, n=2).

**Supplemental Table S1.** List of primer sets for *in vivo* RNA gene expression.

| Primer           | Sequence 5' to 3'      |
|------------------|------------------------|
| MIP-1 $\alpha$ F | TCCTCGCAAATTCGTAGCCG   |
| MIP-1 $\alpha$ R | TCAGCTCCAGGTCAGAGATGT  |
| IL-8 F           | AGTGCAGAACTTCGATGCCA   |
| IL-8 R           | AGCCACGGAGAATGGGTTTT   |
| IL-1 $\beta$ F   | GGTACATGGTTGCTGCCTGA   |
| IL-1 $\beta$ R   | TGGCTTAGAGGATGGGGTCT   |
| IL-6 F           | GGTGATGCCACCTCAGACAA   |
| IL-6 R           | TCTGCACAGCCTCGACATTT   |
| IL-17A F         | GCCACTCGGGCTGTATCAAT   |
| IL-17A R         | GGATCTCTTGCTGGATGGGG   |
| IL-24 F          | CGCAGGCGTTTTCTGCTATT   |
| IL-24 R          | TCAGCGCTGGTAGAATGTCTC  |
| MMP-9 F          | CCAGCACAGACGAGTTCCTT   |
| MMP-9 R          | GTCACCCCCAAAACCATTGC   |
| MMP-13 F         | AGCCGTTCACTTTGAGGCTA   |
| MMP-13 R         | CTCTCCCTCCCTAGCAACTCC  |
| TGFB1 F          | ATTTAAGGACATCGTGCCCCA  |
| TGFB1 R          | CCGCACCTGAGACATATGGA   |
| MTF F            | AGTCGTTGATAGCTCCTGTCTG |
| MTF R            | AGATGGGAGGGGACAACCAA   |

**Supplemental Table S2.** 12-month stability assessment of patches (25 °C at 60% RH) or 6-month assessment of patches (40 °C at 75% RH) for cold flow, crystallization, area weights, % drug content, residual solvents, and microbial quality. n.a. = Not available.

| Parameter               | Units                 | Initial                   |                           | 1 Month       |               | 3 Month       |               | 6 Month                   |                           | 12 Month                  |
|-------------------------|-----------------------|---------------------------|---------------------------|---------------|---------------|---------------|---------------|---------------------------|---------------------------|---------------------------|
|                         |                       | 25°C / 60% RH             | 40°C / 75% RH             | 25°C / 60% RH | 40°C / 75% RH | 25°C / 60% RH | 40°C / 75% RH | 25°C / 60% RH             | 40°C / 75% RH             | 25°C / 60% RH             |
| Cold Flow               |                       | 0                         | 0                         | 0             | 0             | 0             | 0             | 0                         | 0                         | 0                         |
| Crystals                |                       | not visible               | not visible               | not visible   | not visible   | not visible   | not visible   | not visible               | not visible               | not visible               |
| Weight                  |                       |                           |                           |               |               |               |               |                           |                           |                           |
| Mean                    | mg                    | 200.6                     | 200.6                     | 195.8         | 197.5         | 197.9         | 198.7         | 197.1                     | 194.4                     | 196.4                     |
| Min                     | mg                    | 199.6                     | 199.6                     | 192.6         | 195.6         | 195.4         | 197           | 196.4                     | 192.5                     | 194.6                     |
| Max                     | mg                    | 201.5                     | 201.5                     | 200.8         | 200.4         | 200.3         | 200           | 197.7                     | 196.4                     | 198.3                     |
| Drug Content            | mg / 5cm <sup>2</sup> | 8.90                      | 8.90                      | 8.74          | 8.68          | 8.81          | 8.74          | 8.80                      | 8.94                      | 8.71                      |
| % Drug Content of Label | %                     | 98.9                      | 98.9                      | 97.1          | 96.5          | 97.9          | 97.1          | 97.8                      | 99.3                      | 96.8                      |
| 18 Hour Drug Release    | %                     | 49 ± 2                    | 49 ± 2                    | 54 ± 1        | 47 ± 1        | 53 ± 2        | 49 ± 1        | 59 ± 3                    | 56 ± 2                    | 56 ± 2                    |
| 48 Hour Drug Release    | %                     | 67 ± 2                    | 67 ± 2                    | 73 ± 1        | 65 ± 1        | 63 ± 3        | 67 ± 2        | 78 ± 2                    | 74 ± 2                    | 74 ± 2                    |
| Residual Solvents       |                       |                           |                           |               |               |               |               |                           |                           |                           |
| Ethyl Acetate           | ppm                   | 2                         | 2                         | n.a.          | n.a.          | n.a.          | n.a.          | n.a.                      | n.a.                      | n.a.                      |
| 2-Propanol              | ppm                   | 18                        | 18                        | n.a.          | n.a.          | n.a.          | n.a.          | n.a.                      | n.a.                      | n.a.                      |
| n-Hexane                | ppm                   | n.d.                      | n.d.                      | n.a.          | n.a.          | n.a.          | n.a.          | n.a.                      | n.a.                      | n.a.                      |
| Toluene                 | ppm                   | n.d.                      | n.d.                      | n.a.          | n.a.          | n.a.          | n.a.          | n.a.                      | n.a.                      | n.a.                      |
| Acetylacetone           | ppm                   | 47                        | 47                        | n.a.          | n.a.          | n.a.          | n.a.          | n.a.                      | n.a.                      | n.a.                      |
| Microbiological Quality |                       | free of<br>microorganisms | free of<br>microorganisms | n.a.          | n.a.          | n.a.          | n.a.          | free of<br>microorganisms | free of<br>microorganisms | free of<br>microorganisms |
